# Supplementary material for: The first zinc phosphite with remarkable structural and functional transformations
Source: Royal Society of Chemistry journal article supplement (doi:10.1039/c5cc01886b), 2015-01-01
Supplement: c5cc01886b1.pdf [file c5cc01886b1.pdf]

Supporting Information

**The First Zinc Phosphite with Remarkable Structural and  
Functional Transformations**

Chih-Min Wang,<sup>\*,a</sup> Tsung-Yuan Chang,<sup>b</sup> Li-Wei Lee,<sup>c</sup> Hsiu-Mei Lin,<sup>b</sup> Kuang-Lieh  
Lu,<sup>c</sup> and Kwang-Hwa Lii<sup>\*,a,c</sup>

<sup>a</sup>Department of Chemistry, National Central University, Jhongli, Taiwan 320,  
R.O.C.

<sup>b</sup>Institute of Optoelectronic Sciences, National Taiwan Ocean University,  
Keelung, Taiwan 202, R.O.C.

<sup>c</sup>Institute of Chemistry, Academia Sinica, Nankang, Taipei, Taiwan 115, R.O.C.

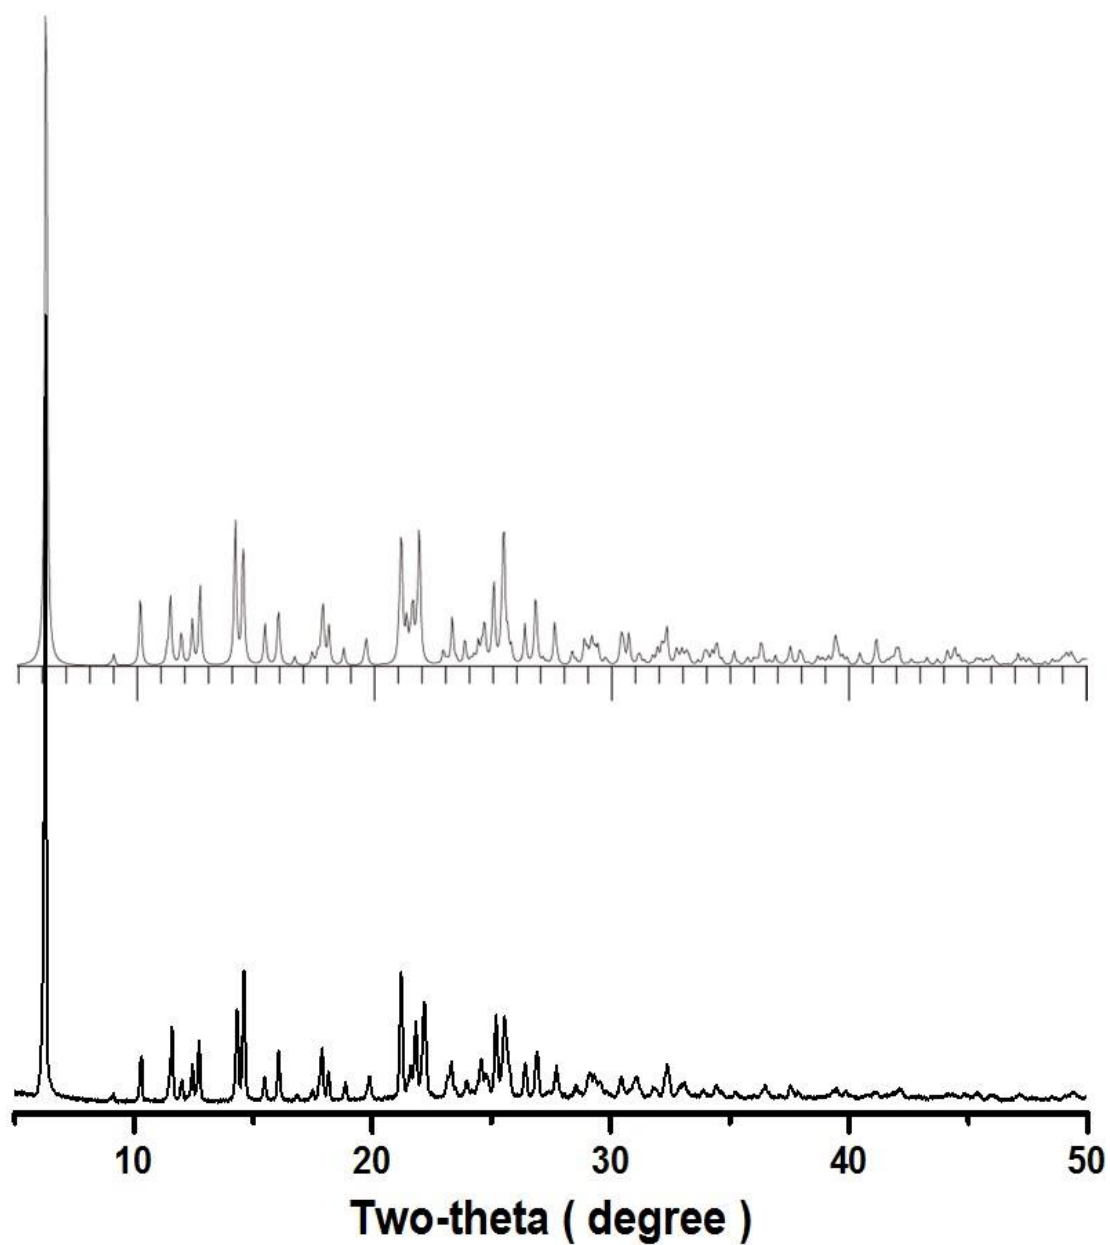

**Figure S1** X-ray powder pattern of NCU-2 (bottom). Simulated powder pattern from the atomic coordinates derived by single-crystal X-ray diffraction (top).

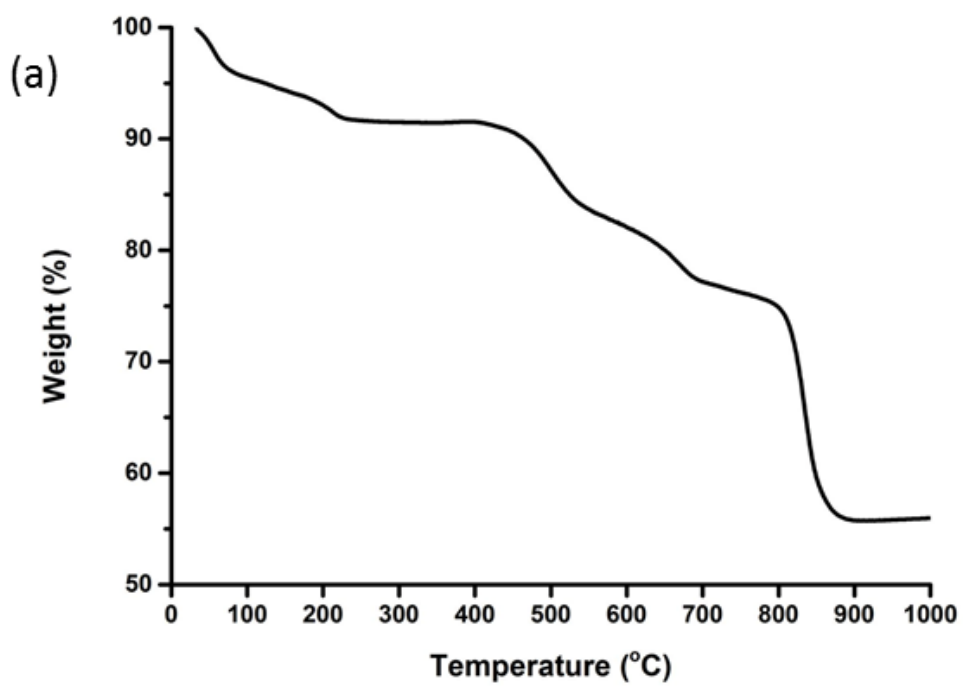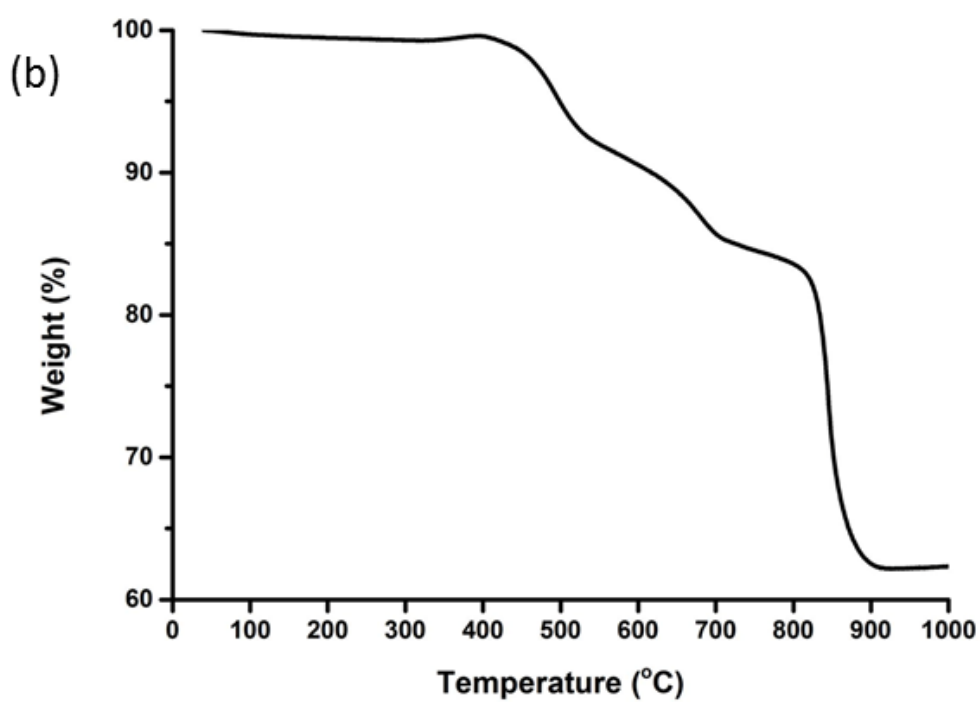

**Figure S2** TGA curve for NCU-2 (a) and NCU-2b (b) measured in air at 5 °C/min.

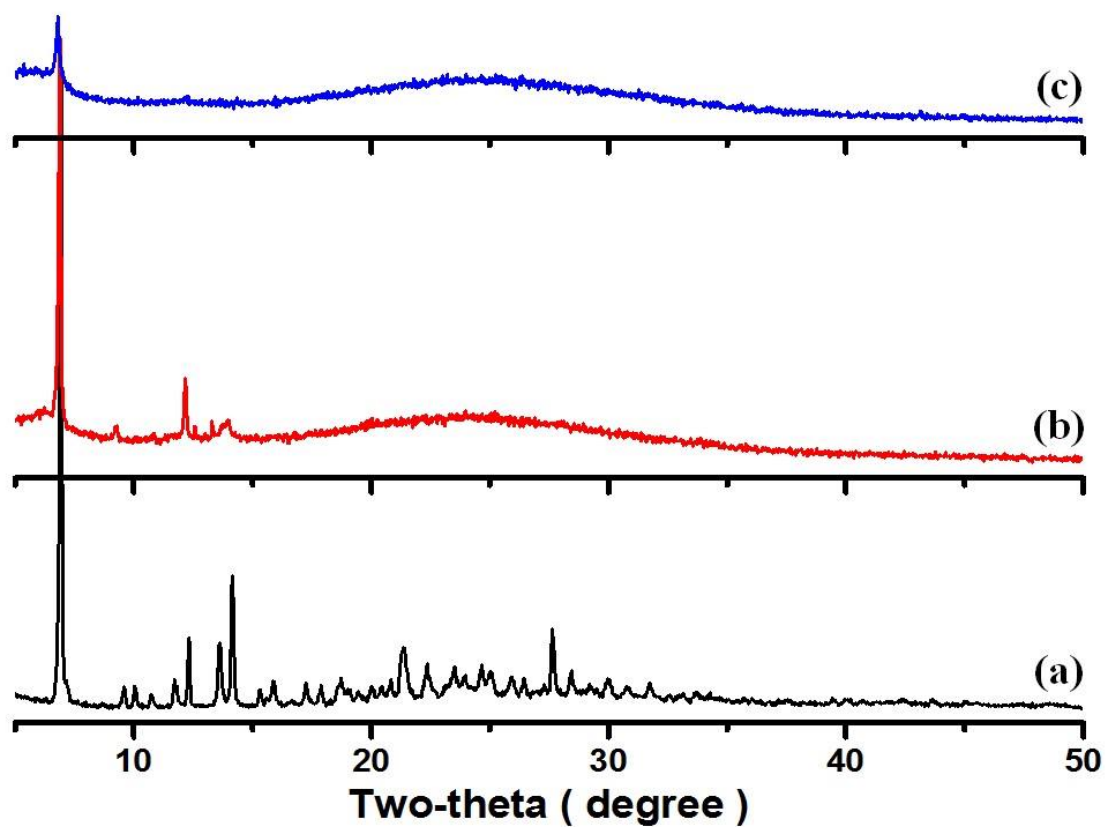

**Figure S3** The X-ray powder patterns for NCU-2b collected during the thermal-stability studies: (a) holding for 2 h at 250°C (b), 300°C (c), and 350°C.

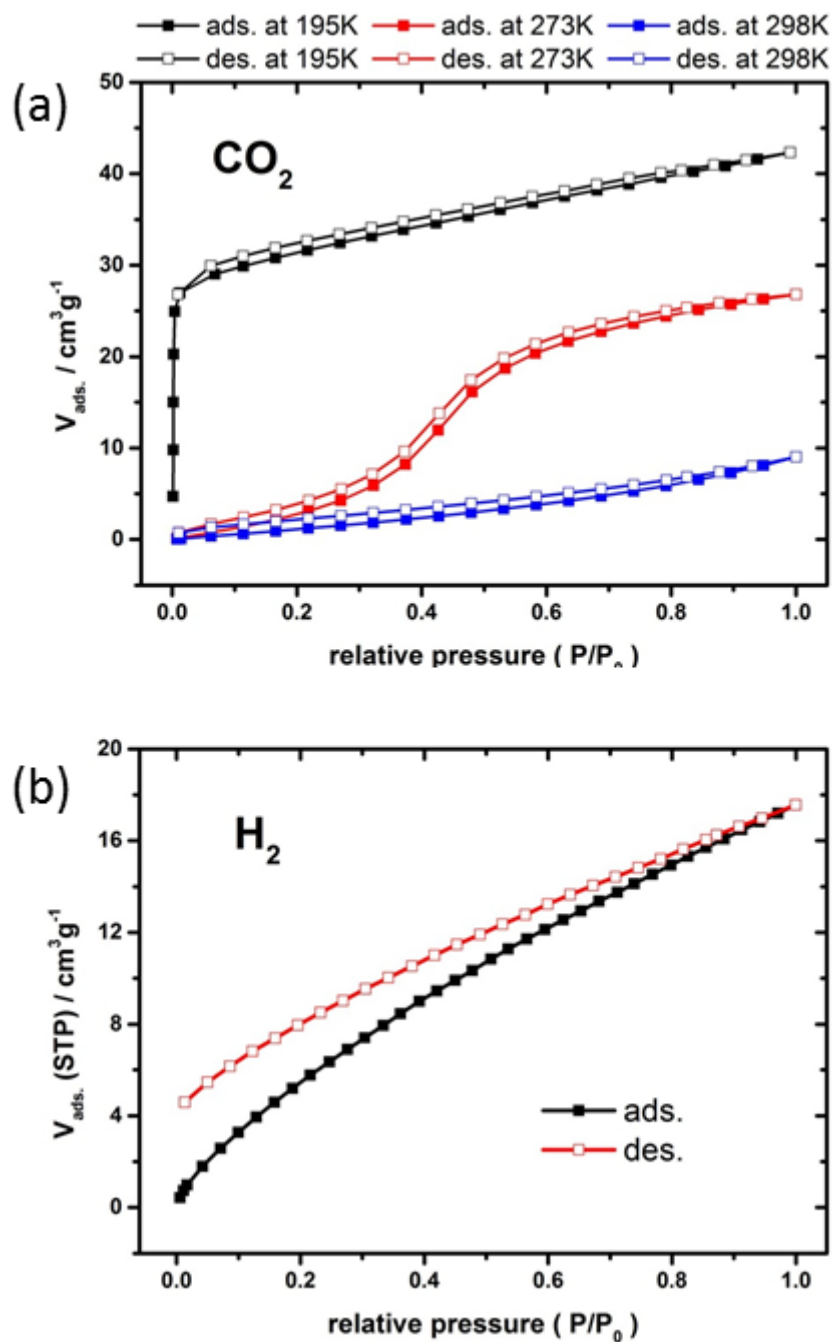

Figure S4 The gas adsorption-desorption isotherms for CO<sub>2</sub> (a) and H<sub>2</sub> (b).

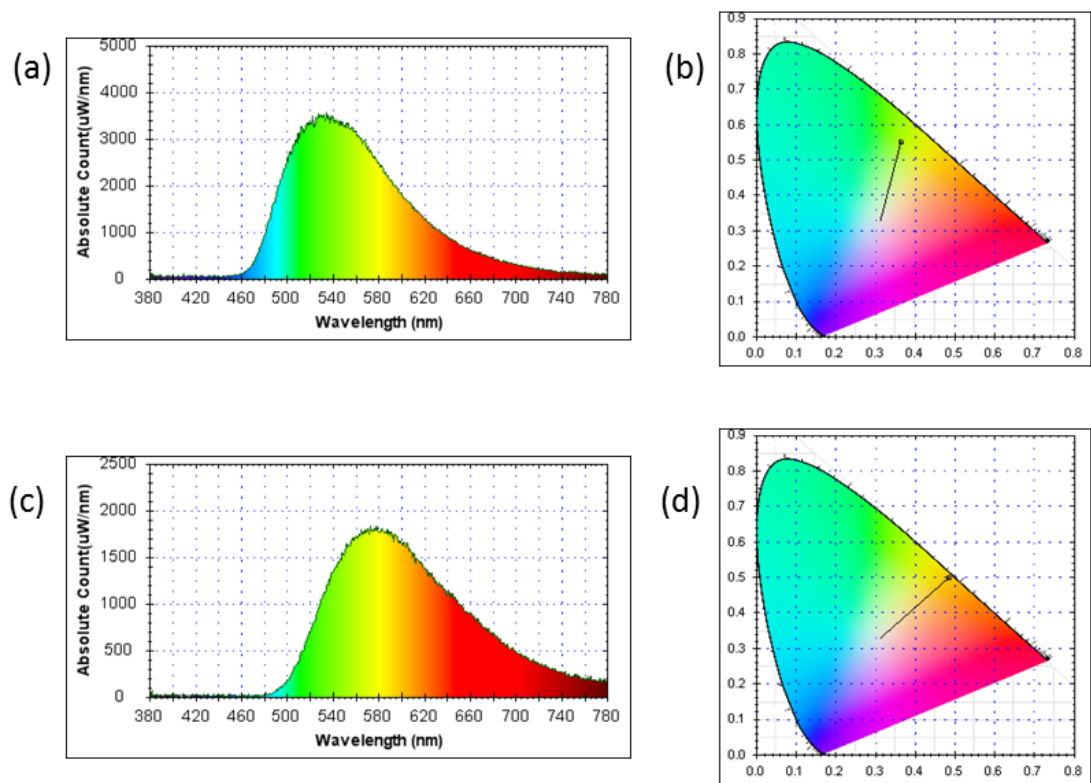

**Figure S5** Electroluminescence spectra and CIE coordinates for the NCU-2a (a and b) and NCU-1 (c and d) coated LED devices.
